# Supplementary material
Source: publisher figshare collection journal article supplement (https://geolsoc.figshare.com/articles/dataset/_/3454163)
Supplement: Supplementary file 1 [file 1]

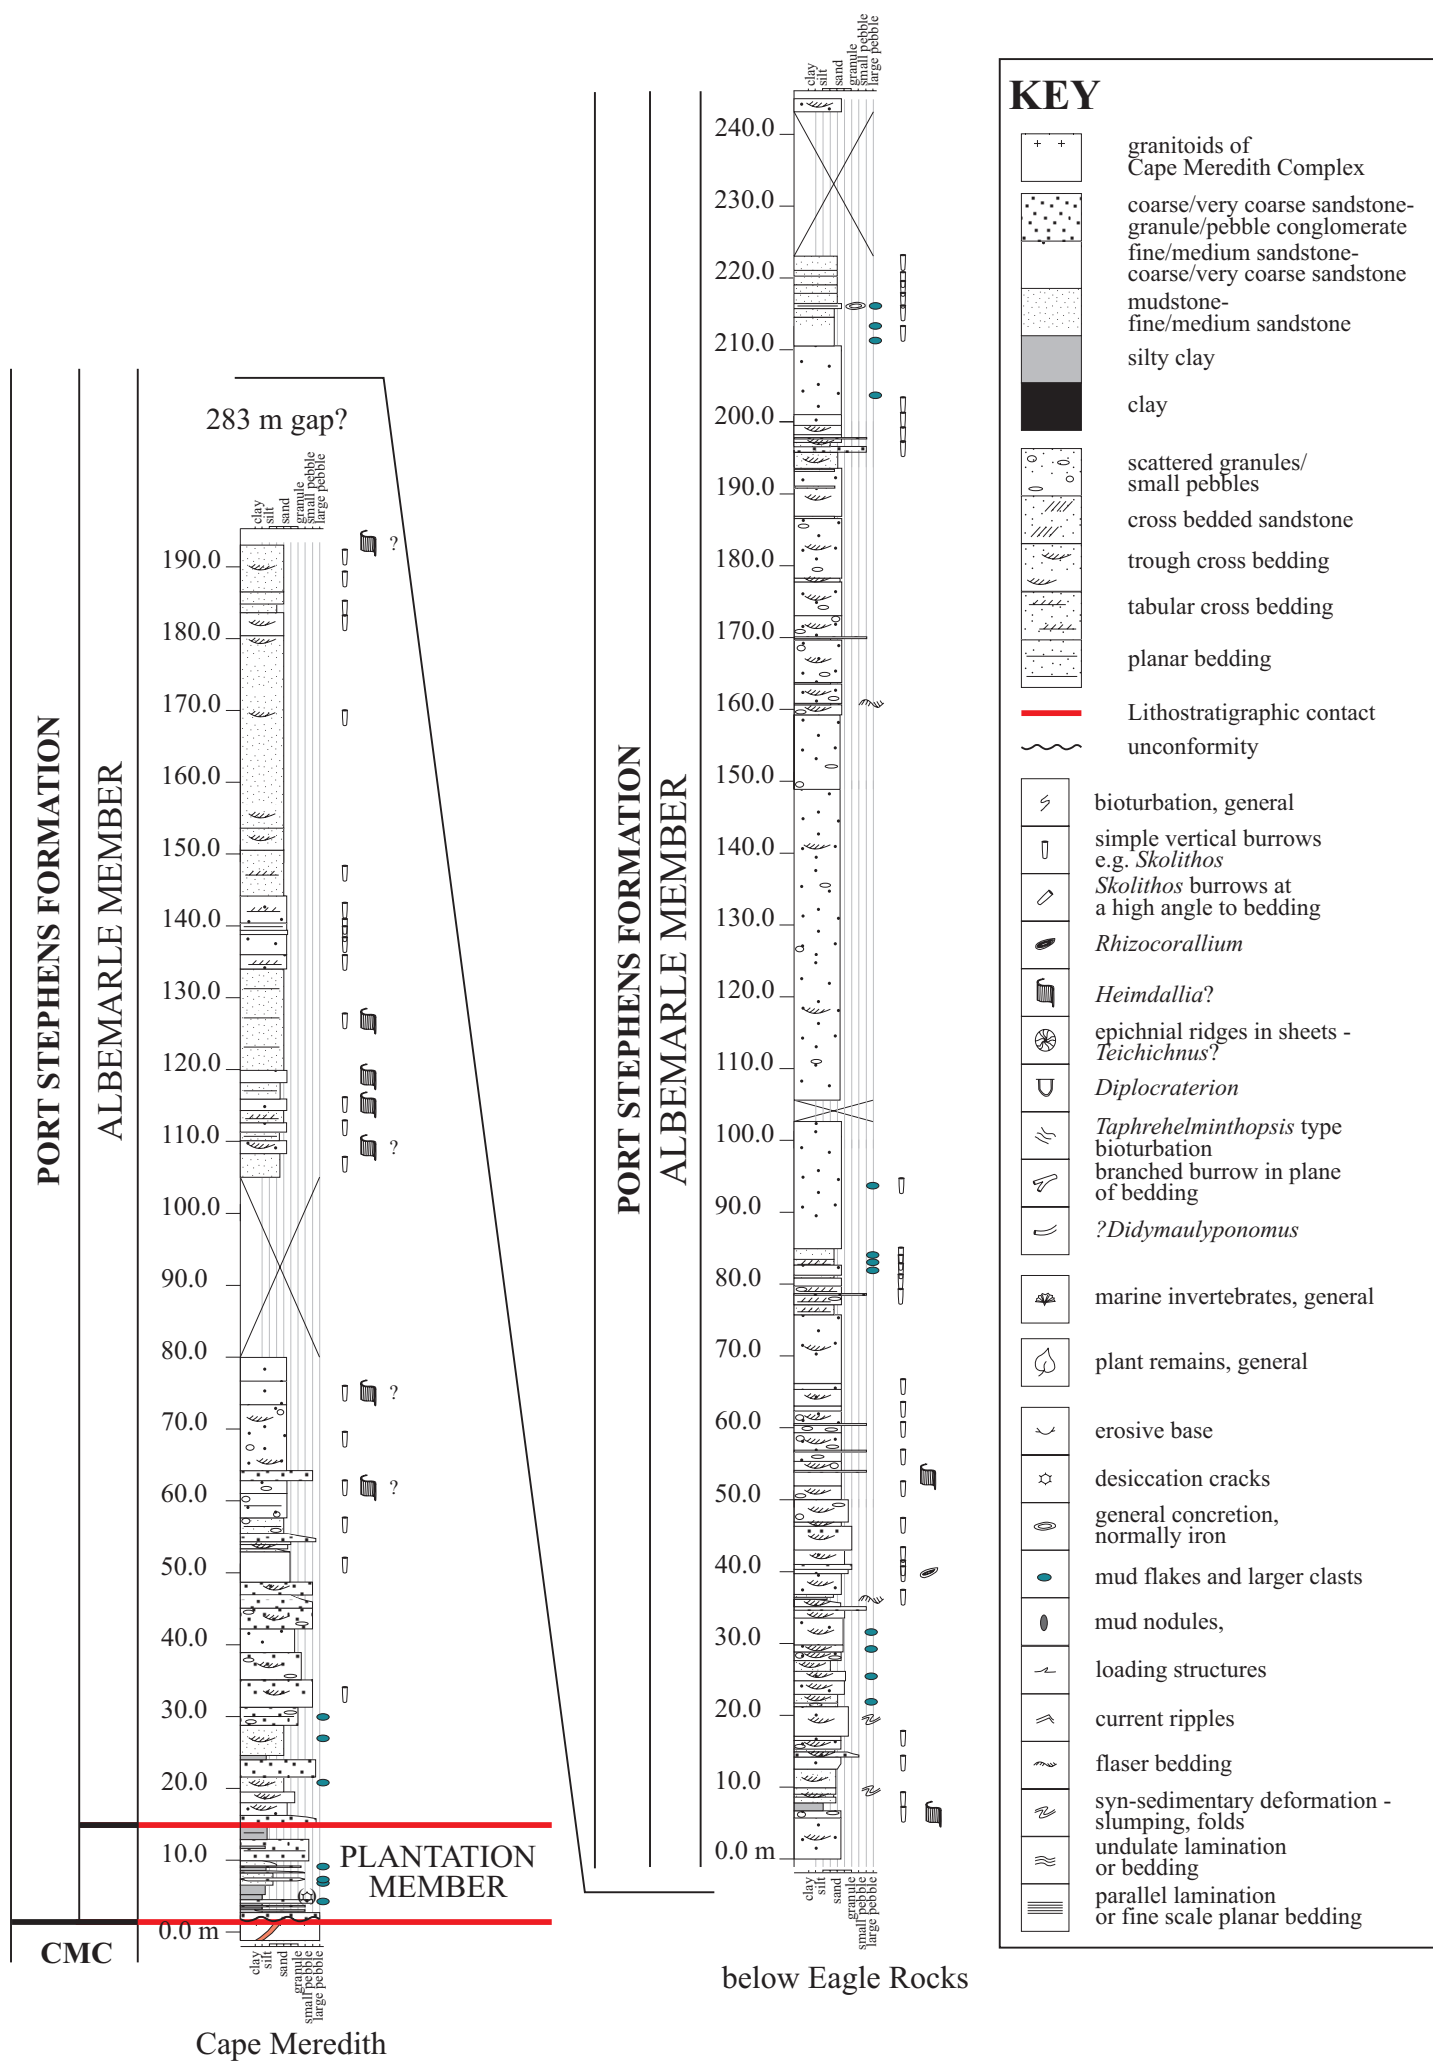

**Appendix 1.** Logs of the Port Stephens Formation, section locality indicated below each section (Fig. 5). Long diagonal lines join sections.

**1a.** Base of the Port Stephens Formation over the Cape Meredith Complex. Lower part of the Albemarle Member.
