# Supplementary material
Source: publisher figshare collection journal article supplement (https://geolsoc.figshare.com/articles/dataset/_/3454163)
Supplement: Supplementary file 3 [file 1]

**FOX BAY FM.**

**PORT STEPHENS FM.: FISH CREEK MEMBER**

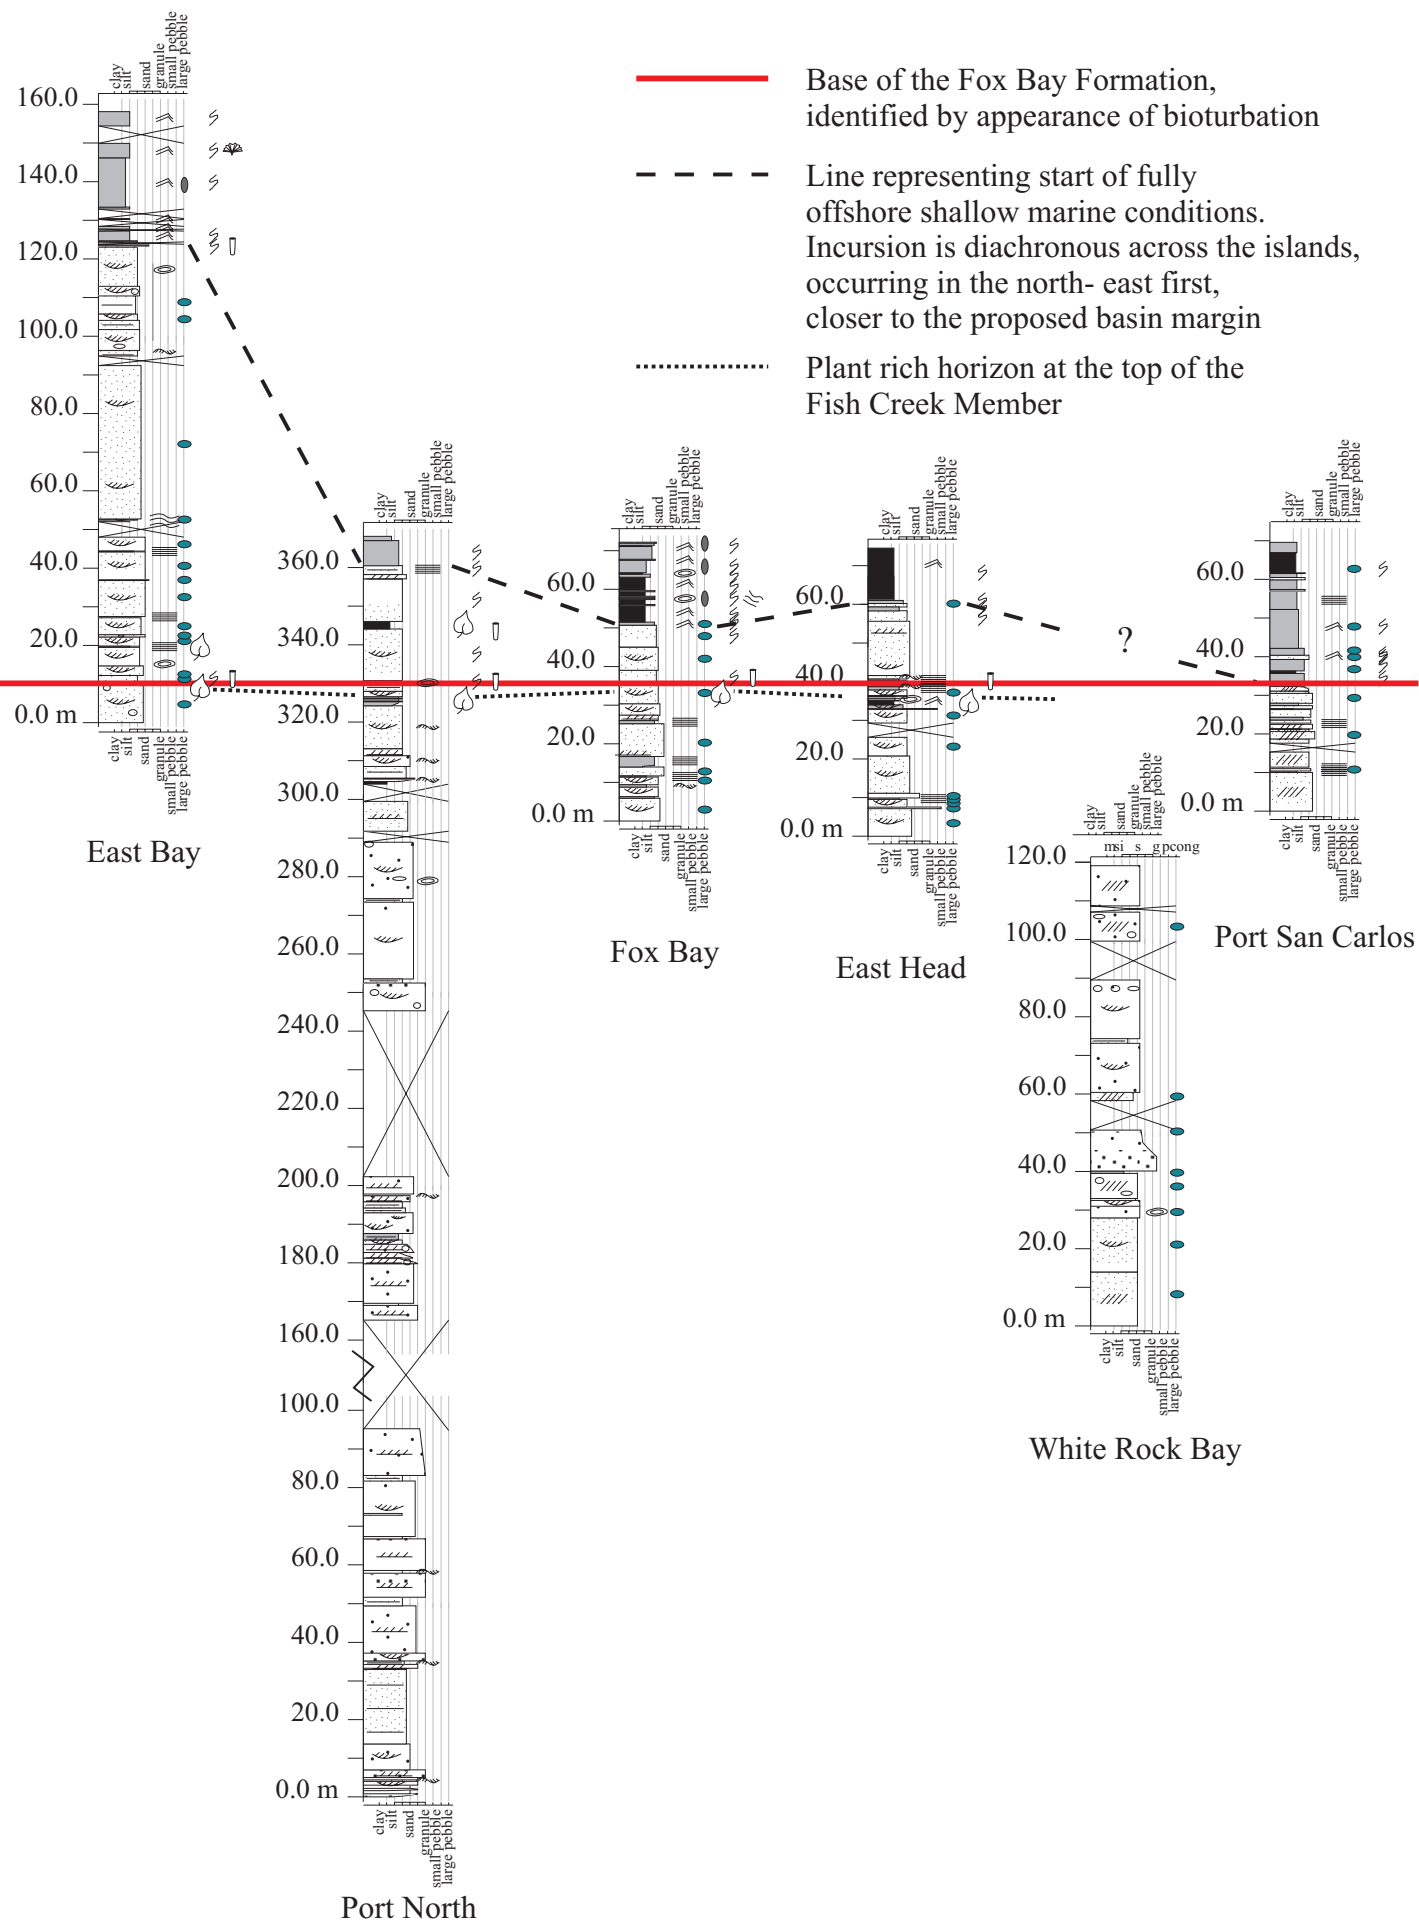

**Appendix 2.** Logs of the Fish Creek Member, locality indicated with each section. Sections ordered approximately from south-west to north-east across West and East Falkland. For key see Appendix 1.
