# Supplementary material
Source: publisher figshare collection journal article supplement (https://geolsoc.figshare.com/articles/dataset/_/3454163)
Supplement: Supplementary file 4 [file 1]

**PORT STEPHENS FORMATION**  
**MOUNT ALICE MEMBER**  
**ALBEMARLE MEMBER**

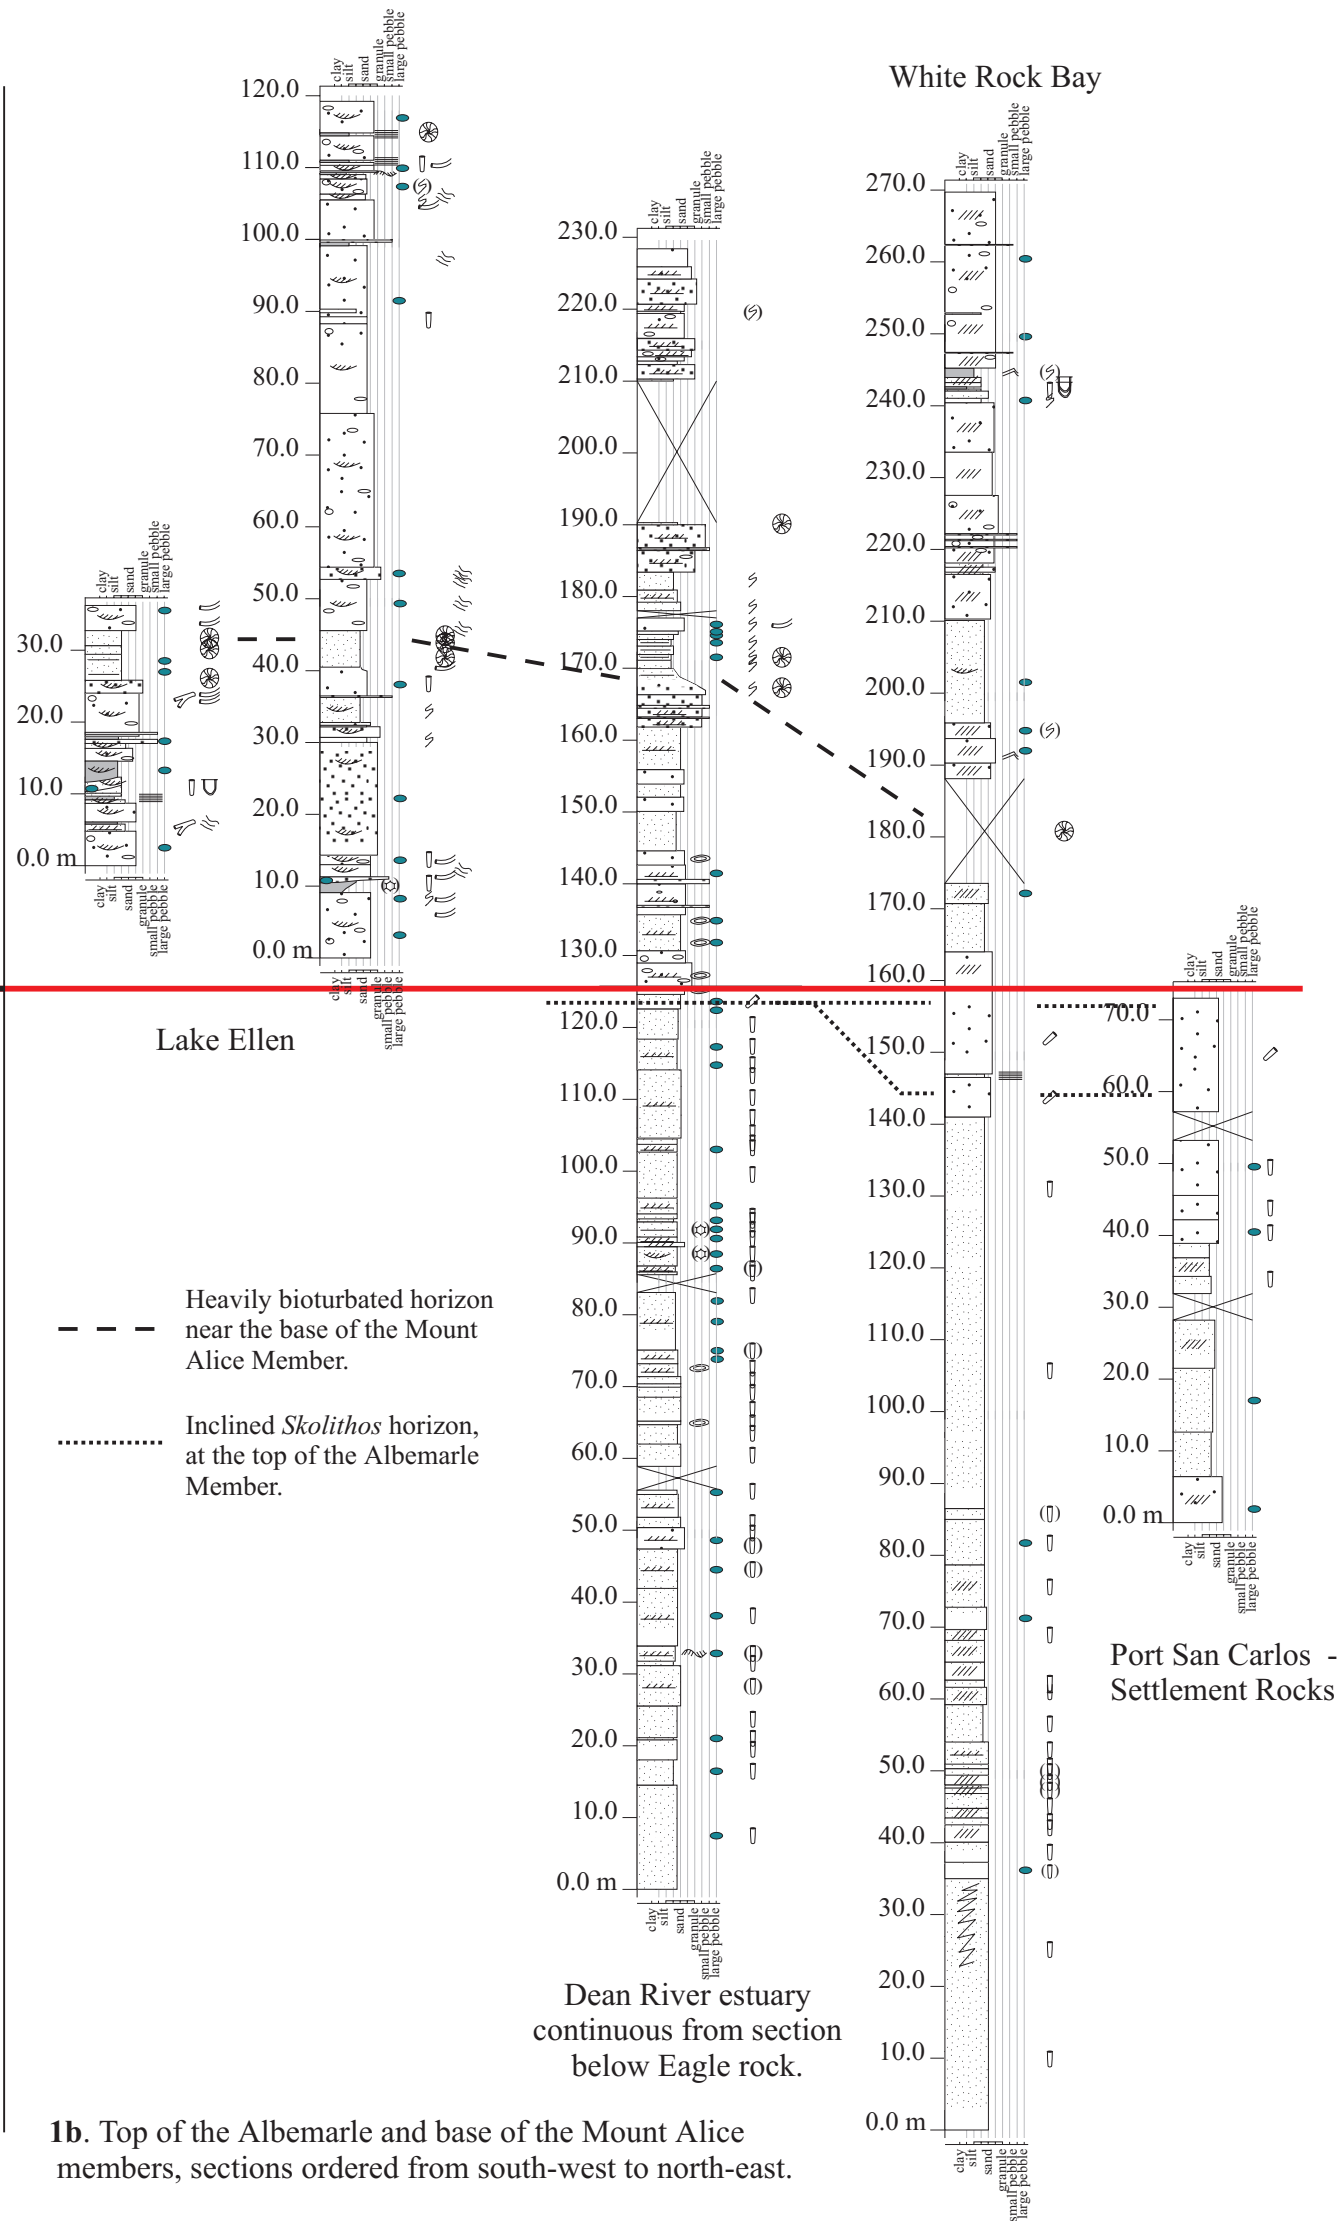

**1b.** Top of the Albemarle and base of the Mount Alice members, sections ordered from south-west to north-east.
