# Supplementary material
Source: publisher figshare collection journal article supplement (https://geolsoc.figshare.com/articles/dataset/_/3454163)

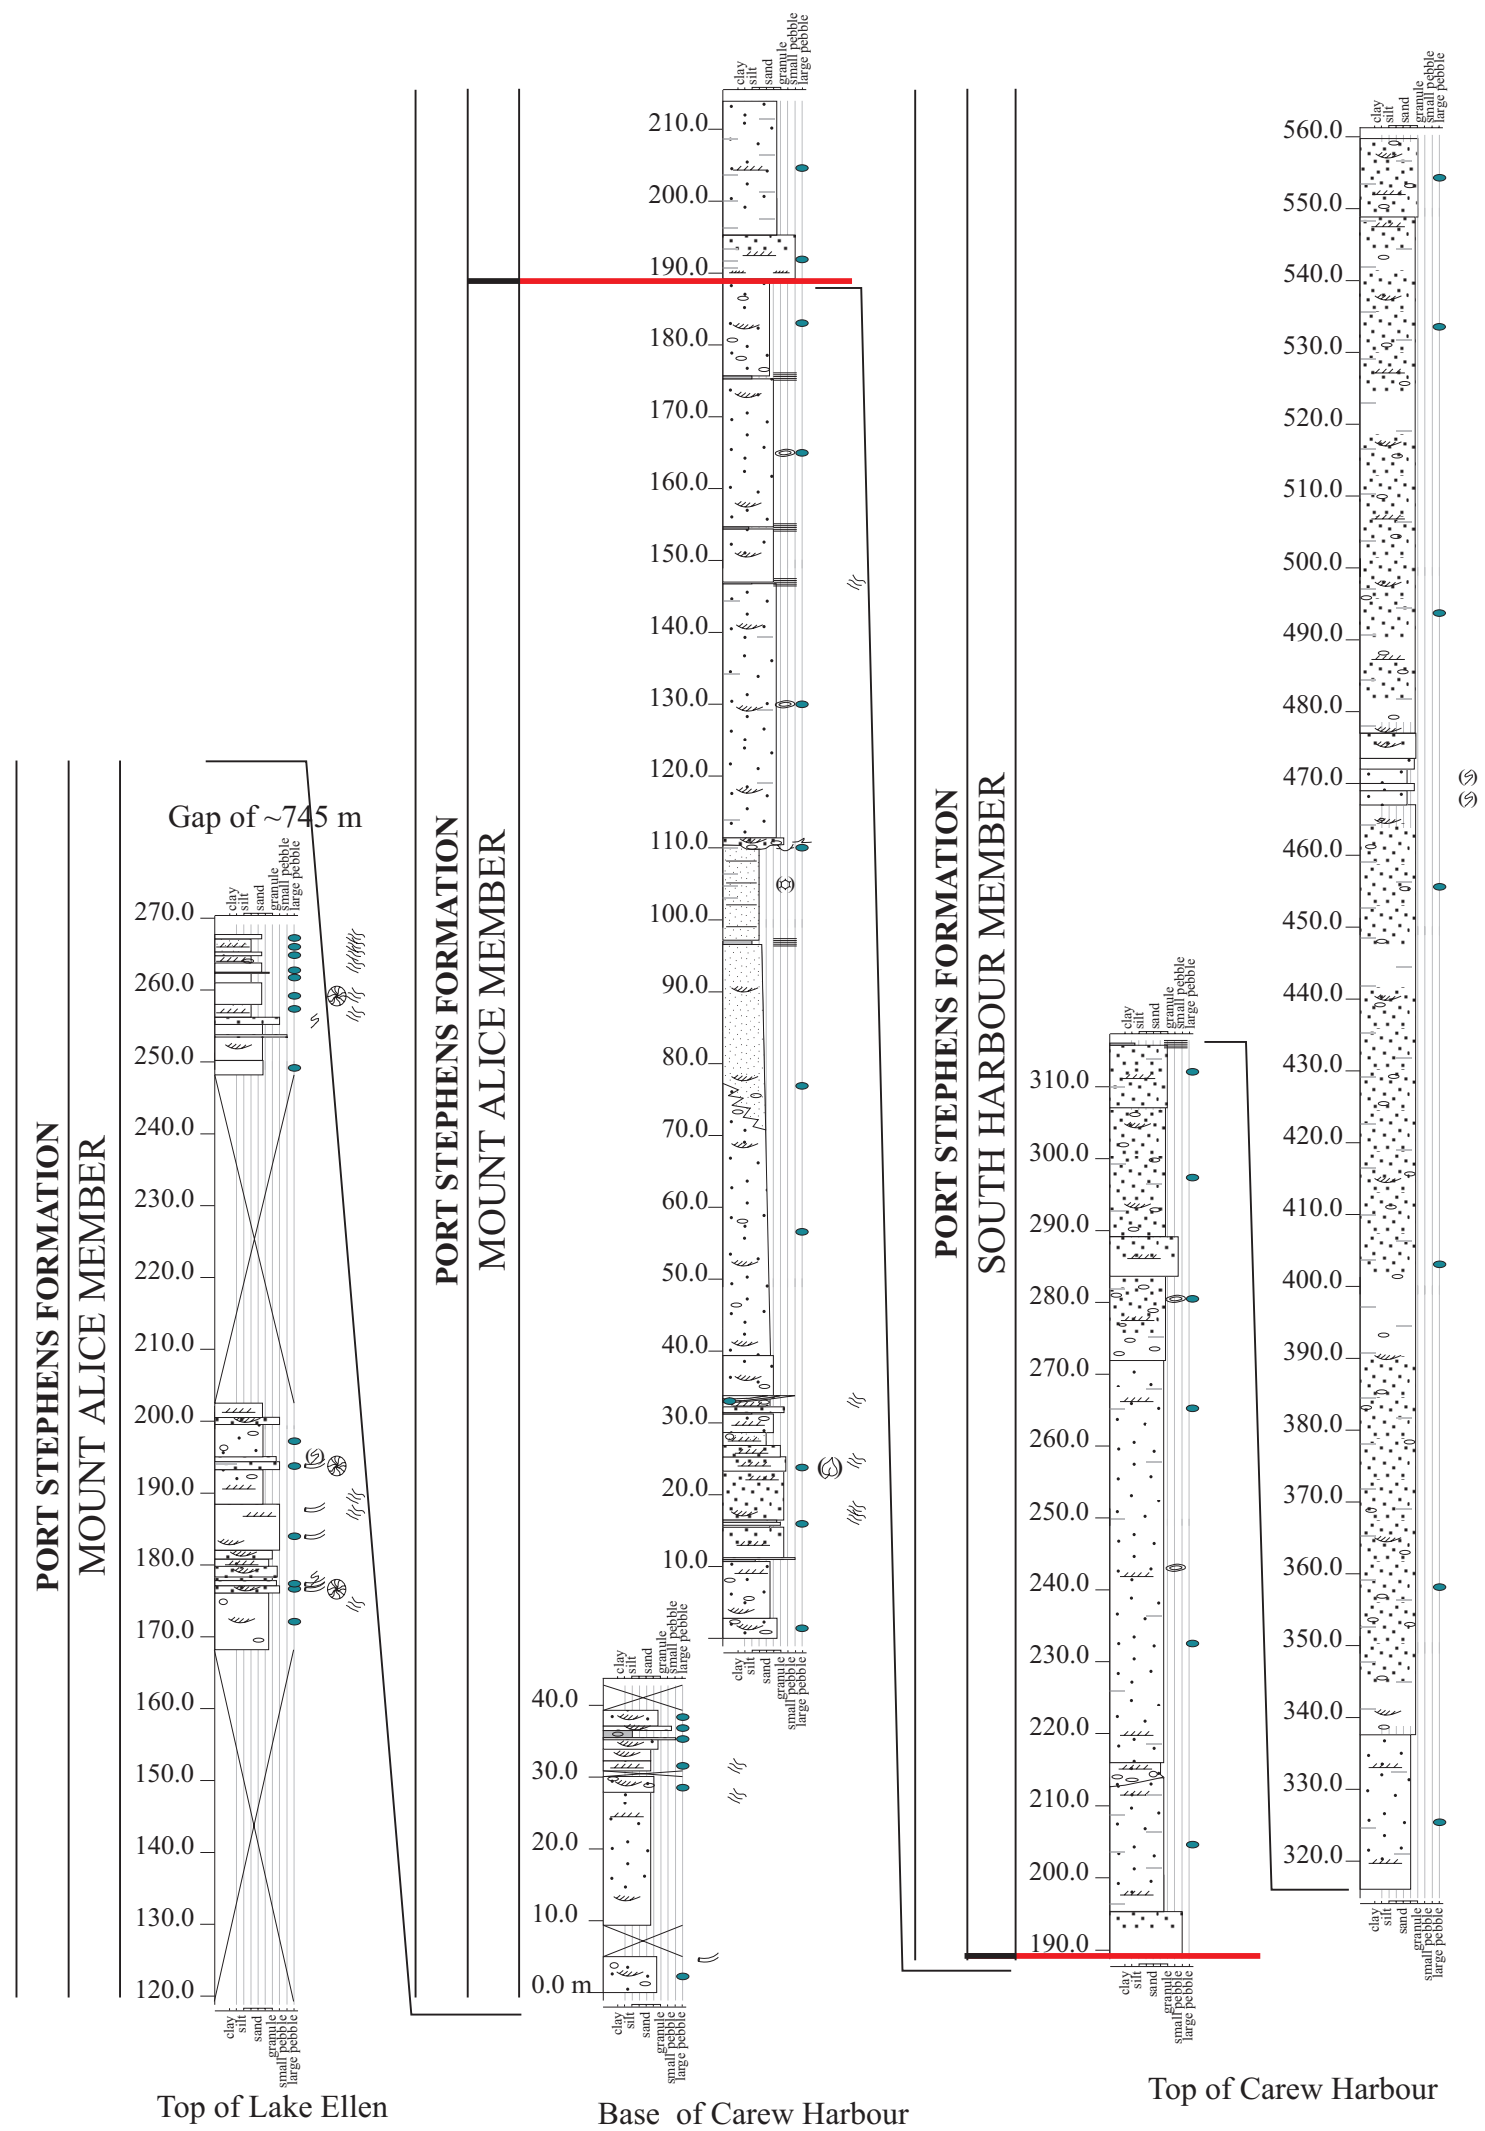

1c. Top of the Mount Alice Member, showing the gradational change to the South Harbour Member.

Supplement: Supplementary file 2 [file 1]
